# Supplementary material for: Nano-Structuration of WO3 Nanoleaves by Localized Hydrolysis of an Organometallic Zn Precursor: Application to Photocatalytic NO2 Abatement
Source: MDPI journal article supplement (doi:10.3390/nano12244360), 2022-12-07
Supplement: s1 [file nanomaterials-2072819-supplementary.pdf › nanomaterials-2072819-supplementary.pdf]

# Nano-Structuration of WO<sub>3</sub> Nanoleaves by Localized Hydrolysis of an Organometallic Zn Precursor: Application to Photocatalytic NO<sub>2</sub> Abatement

Kevin Castello Lux <sup>1,2</sup>, Katia Fajerwerg <sup>2,3</sup>, Julie Hot <sup>1</sup>, Erick Ringot <sup>1,4</sup>, Alexandra Bertron <sup>1</sup>, Vincent Collière <sup>2,3</sup>, Myrtil L. Kahn <sup>2</sup>, Stéphane Loridant <sup>5</sup>, Yannick Coppel <sup>2</sup> and Pierre Fau <sup>6,3,\*</sup>

<sup>1</sup> LMDC, INSA/UPS Génie Civil, 135 Avenue de Rangueil, CEDEX 4, 31077 Toulouse, France

<sup>2</sup> LCC-CNRS, UPR8241, 205 Route de Narbonne, CEDEX 4, 31077 Toulouse, France

<sup>3</sup> Université de Toulouse, UT3 Paul Sabatier, 118 Route de Narbonne, CEDEX 04, 31062 Toulouse, France

<sup>4</sup> LRVision SAS, 13 Rue du Développement, 31320 Castanet-Tolosan, France

<sup>5</sup> Univ. Lyon, Université Claude Bernard-Lyon 1, CNRS, IRCELYON-UMR 5256, 2 av. A. Einstein, 69626 Villeurbanne, France

<sup>6</sup> LPCNO-INSA, UMR5215, 135 Avenue de Rangueil, CEDEX 4, 31077 Toulouse, France

\* Correspondence: pfau@insa-toulouse.fr

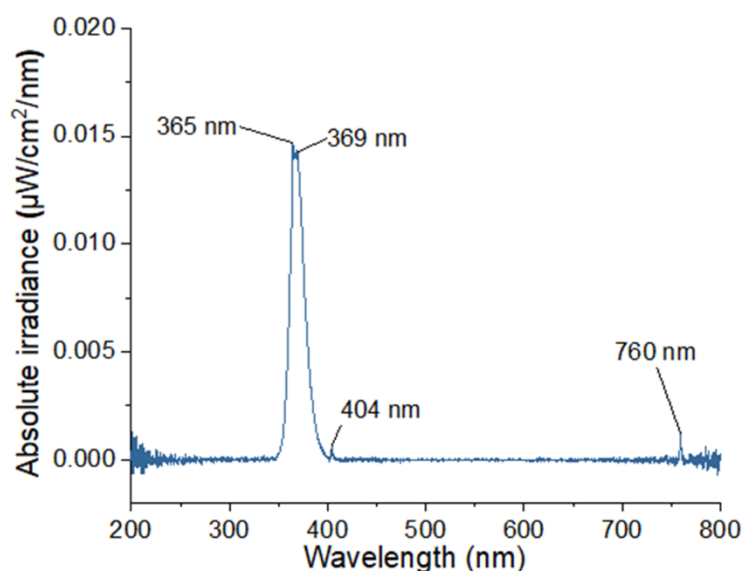

**Figure S1.** Irradiance spectrum of the NARVA Blacklight Blue fluorescent tube used for NO<sub>2</sub> degradation experiments.

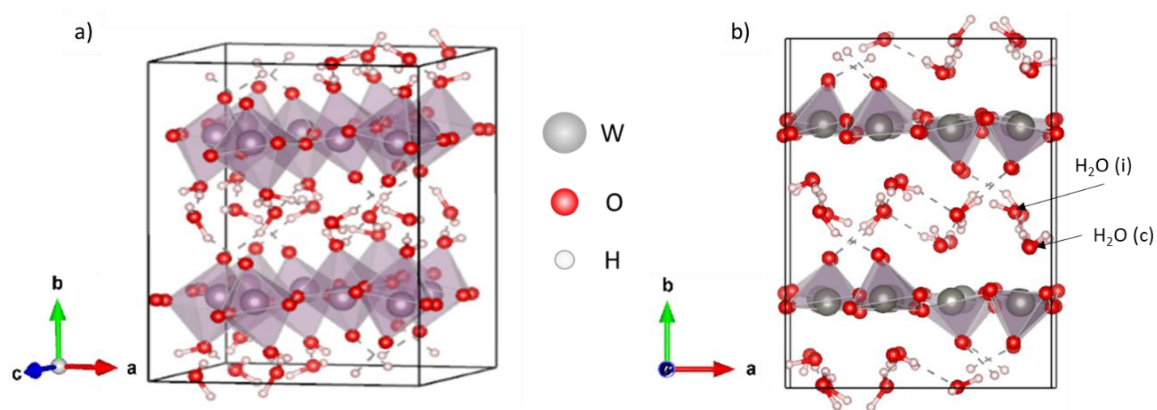

**Figure S2.** a) Arrangement scheme of  $[\text{WO}_5 \cdot \text{H}_2\text{O}]$  octahedrons in the  $\text{WO}_3 \cdot 2\text{H}_2\text{O}$  compound. b) View of the arrangement along c axis showing the two types of  $\text{H}_2\text{O}$  (i) and  $\text{H}_2\text{O}$  (c) molecules for intermediate and coordinated  $\text{H}_2\text{O}$  respectively.

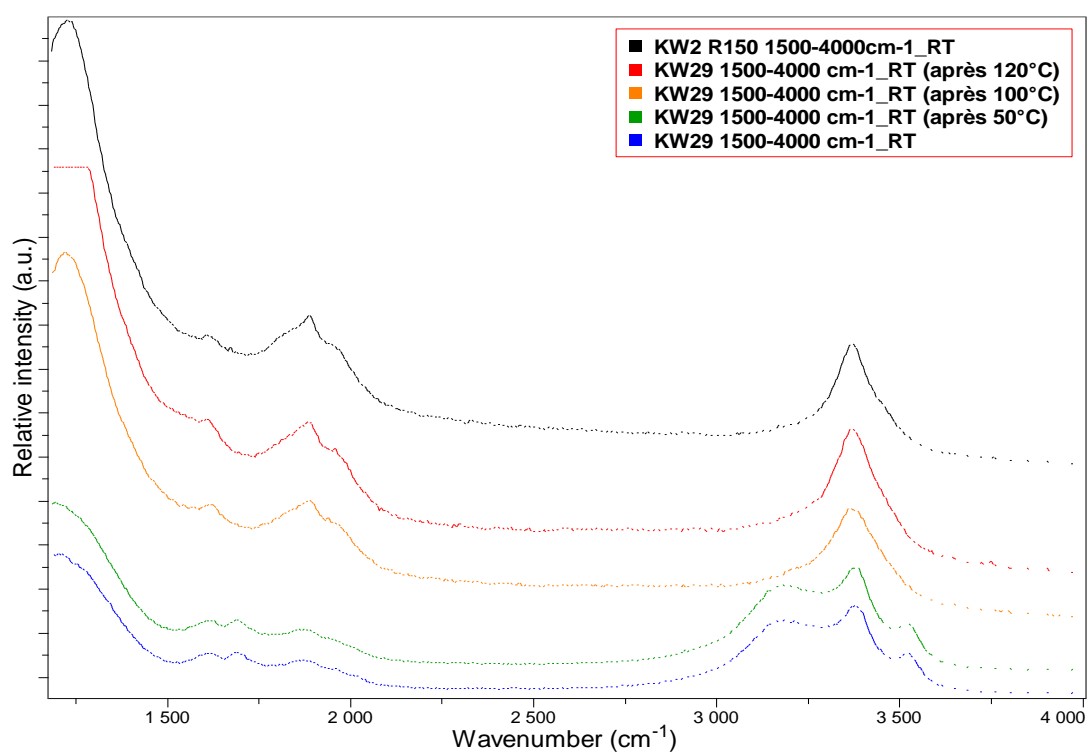

**Figure S3.** Raman analysis of (1) during in situ heating up to 120 °C.

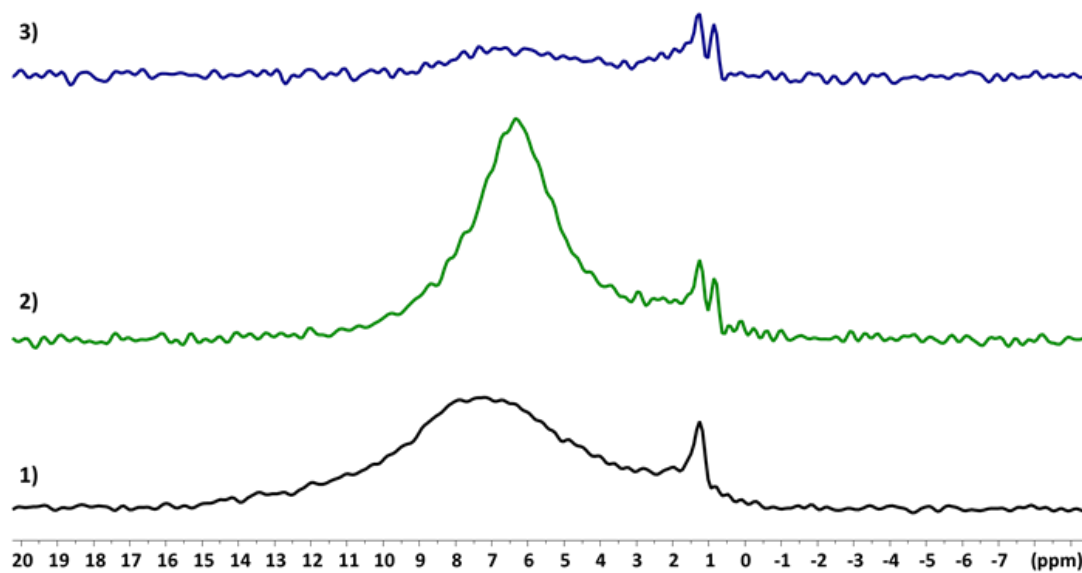

**Figure S4.** <sup>1</sup>H RFDS MAS NMR spectra of (1), (2) and (3)

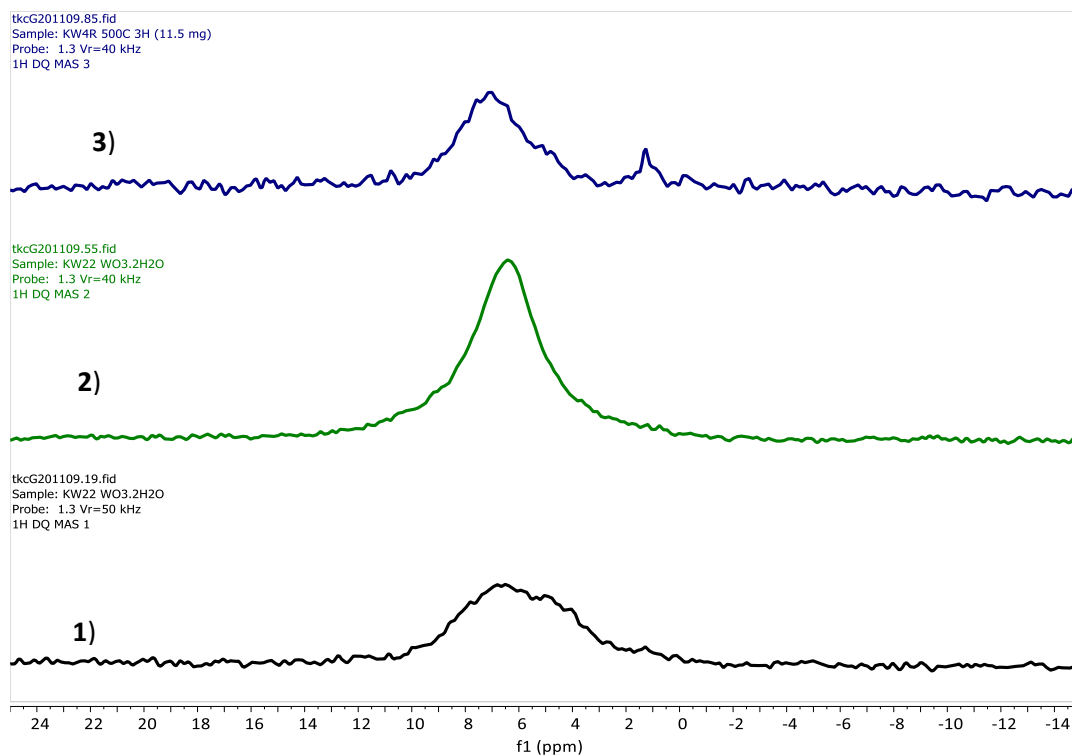

**Figure S5.**  $^1\text{H}$  DQ MAS NMR spectra of (1), (2) and (3)

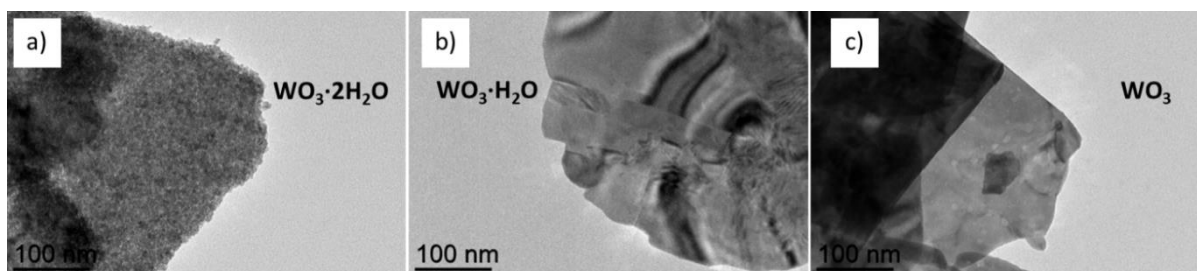

**Figure S6.** TEM images of  $\text{WO}_3 \cdot x\text{H}_2\text{O}$  NLs after reaction with  $\text{Zn}(\text{Cy})_2$ . a)  $x=2$ : a high density of nanosized structures appear at the surface of  $\text{WO}_3$ ; b)  $x=1$ : no modification of the  $\text{WO}_3$  surface; c)  $x=0$ : no modification of the  $\text{WO}_3$  surface.

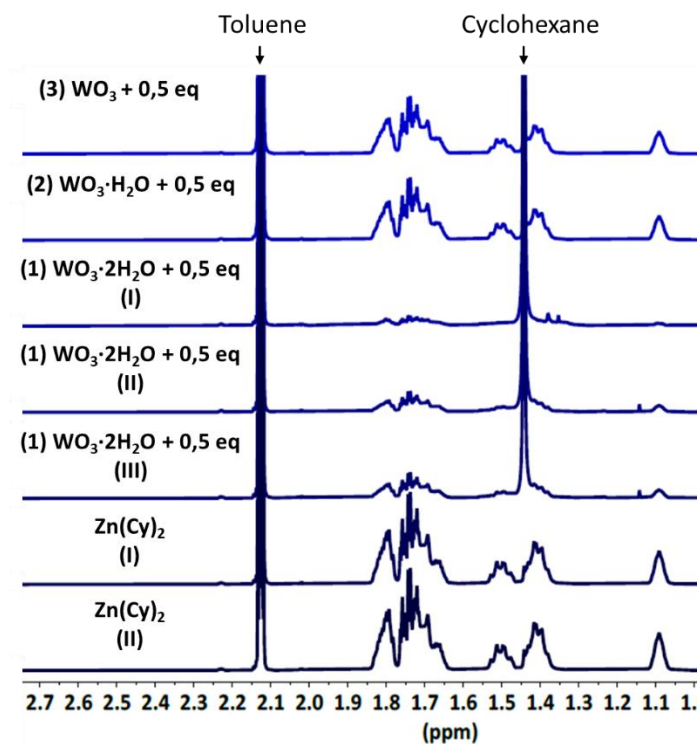

**Figure S7.**  $^1\text{H}$  NMR study of  $\text{Zn}(\text{Cy})_2$  (I and II) and in contact with  $\text{WO}_3 \cdot x \text{H}_2\text{O}$  NL 1)  $x=2$  (I, II and III); 2)  $x=1$  and 3)  $x=0$ . The pic of toluene- $\text{d}^8$  (solvent) and the cyclohexane generation are indexed. No evolution of  $\text{Zn}(\text{Cy})_2$  appear when it is mixed with  $\text{WO}_3 \cdot \text{H}_2\text{O}$  or  $\text{WO}_3$ .

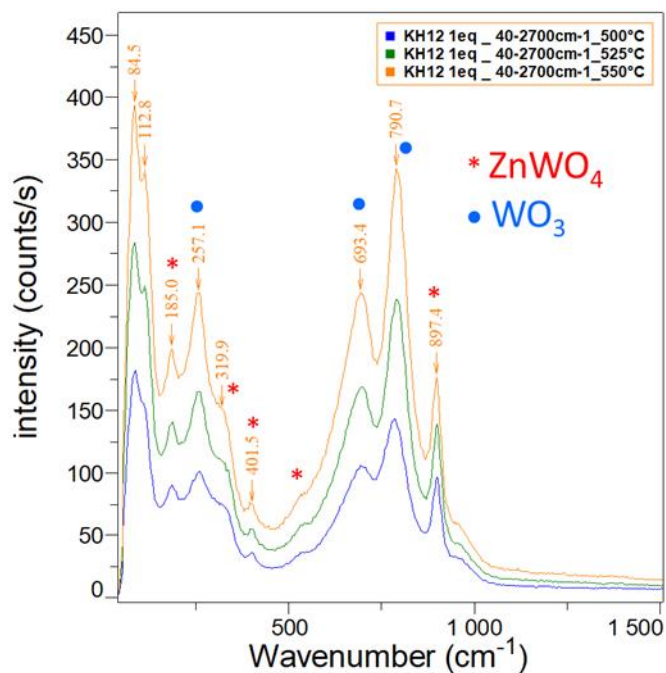

**Figure S8.** Raman spectra of  $\text{ZnWO}_4@ \text{WO}_3$  nanocomposite annealed at 500 °C

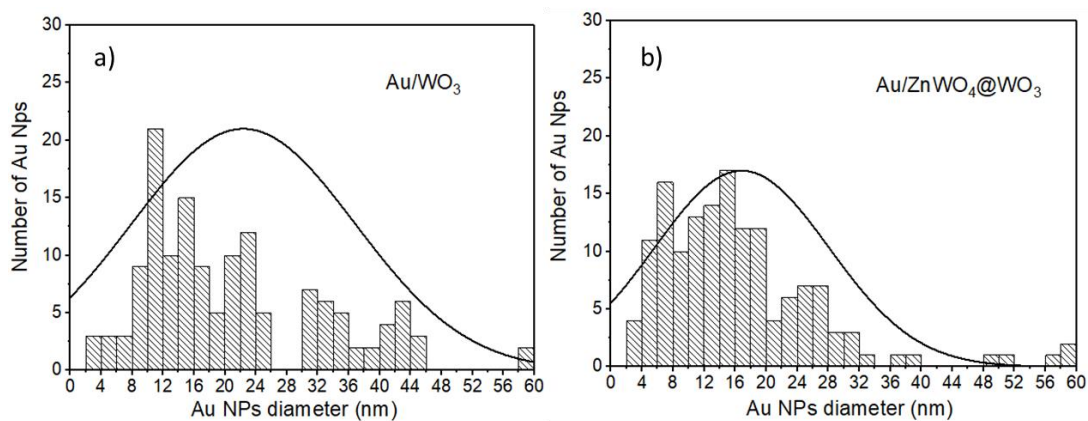

**Figure S9.** Size distribution diagrams of Au NPs measured on TEM image ( $n = 150$ ) for a)  $\text{Au}/\text{WO}_3$  and b)  $\text{Au}/\text{ZnWO}_4/\text{WO}_3$

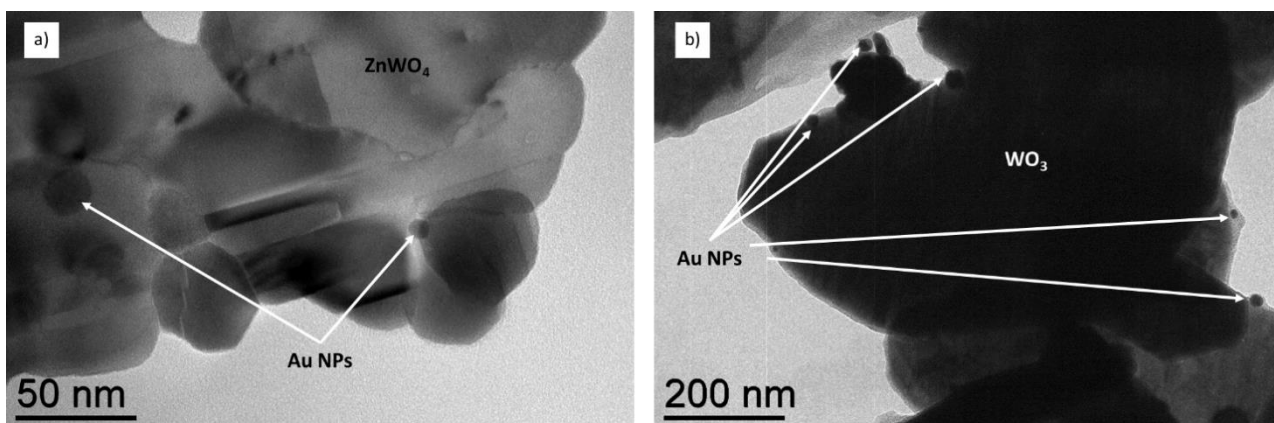

**Figure S10.** TEM image of a)  $\text{Au}/\text{ZnWO}_4/\text{WO}_3$  nanocomposite and b)  $\text{Au}/\text{WO}_3$

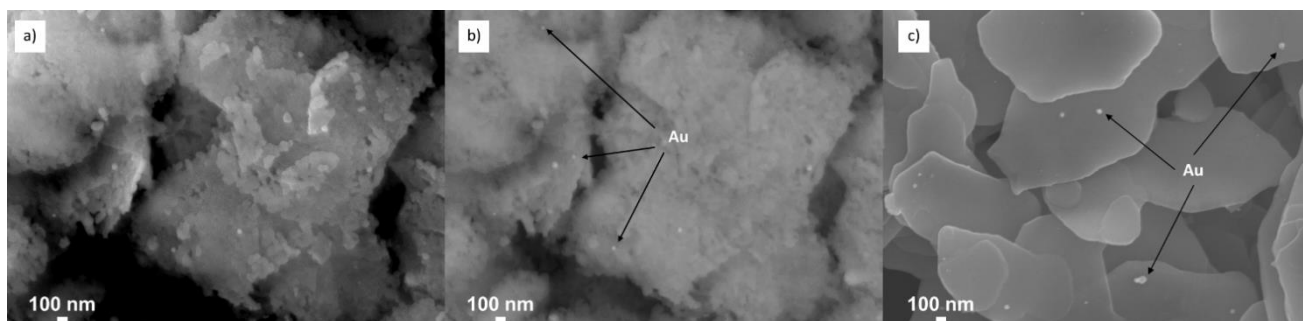

**Figure S11.** SEM-BSE images of a) and b)  $\text{Au}/\text{ZnWO}_4/\text{WO}_3$  composite and c)  $\text{Au}/\text{WO}_3$ . The bright points indicated by arrows correspond to Au nanoparticles.
